# Supplementary material for: Superparticles of gold nanorods with controllable bandwidth and spectral shape for lipophilic SERS
Source: Royal Society of Chemistry journal article supplement (doi:10.1039/d3nr01883k), 2023-01-01
Supplement: d3nr01883k1.pdf [file d3nr01883k1.pdf]

*Supporting information:*

**Superparticles of gold nanorods with controllable bandwidth and  
spectral shape for lipophilic SERS**

*Xun Li<sup>†</sup>, Xi Chen<sup>†</sup>, Jie Liu<sup>†</sup>, Xiaoyu Zhao<sup>‡</sup>, Jia Liu<sup>‡</sup>, Zhiqun Cheng<sup>†</sup>, Tian-Song Deng<sup>†,\*</sup>*

*\*Corresponding author. E-mail: [dengts@pku.edu.cn](mailto:dengts@pku.edu.cn)*

<sup>†</sup>School of Electronics and Information Engineering, Hangzhou Dianzi University, Hangzhou 310018, P.  
R. China.

<sup>‡</sup>College of Materials and Environmental Engineering, Hangzhou Dianzi University, Hangzhou 310018, P.  
R. China.

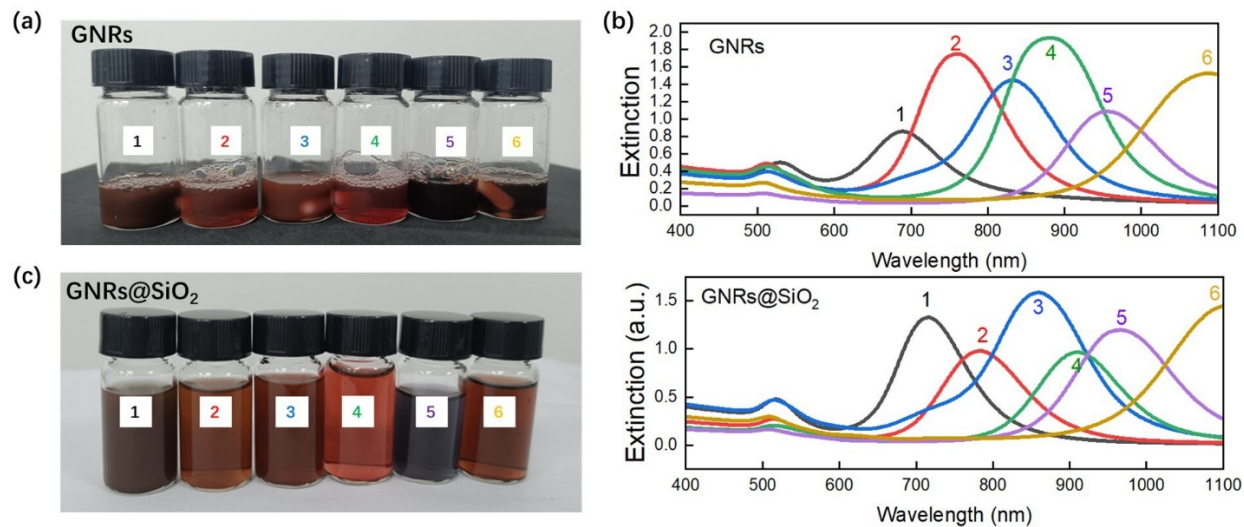

**Fig. S1** Photographs and spectra of different GNRs and GNRs@SiO<sub>2</sub>. (a) The prepared GNRs with six different LSPRs were dispersed in 1.5 mM CTAB, corresponding to Fig. 2a (1-6) of GNRs. (b) Measured spectra of the samples corresponding to GNRs in (a). (c) Six GNRs of different LSPRs were dispersed in ethanol solution after coating a mesoporous silica shell, corresponding to Fig. 2a (1-6) of GNRs@SiO<sub>2</sub>. (d) Measured spectra of the samples corresponding to GNRs@SiO<sub>2</sub> in (c).

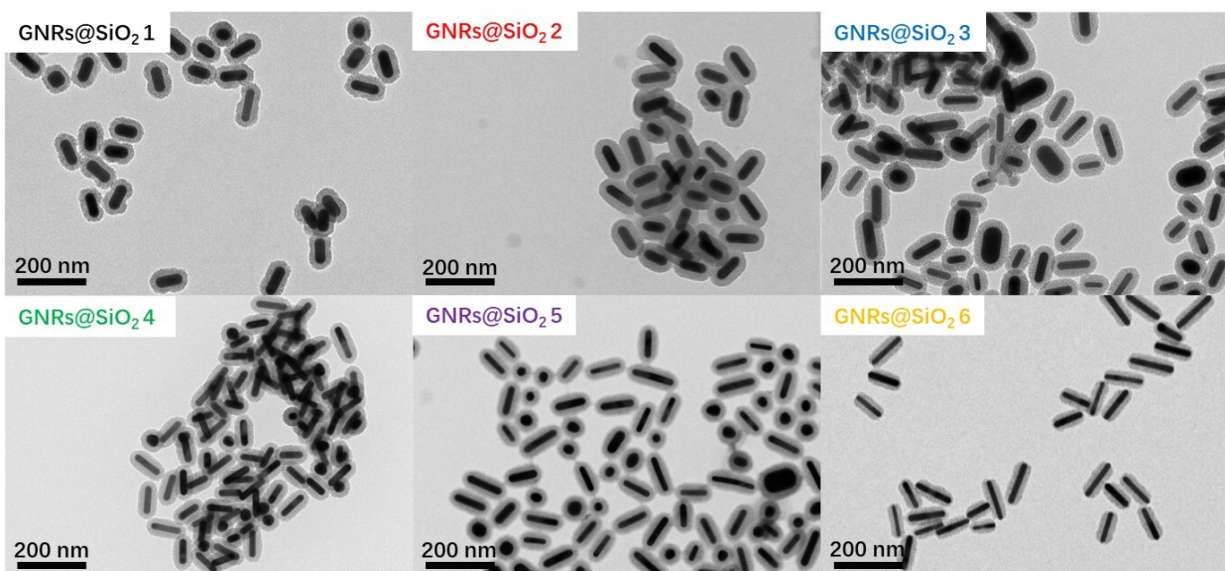

**Fig. S2** TEM images corresponding to GNRs@SiO<sub>2</sub> 1-6 with different LSPRs in Fig. 2a.

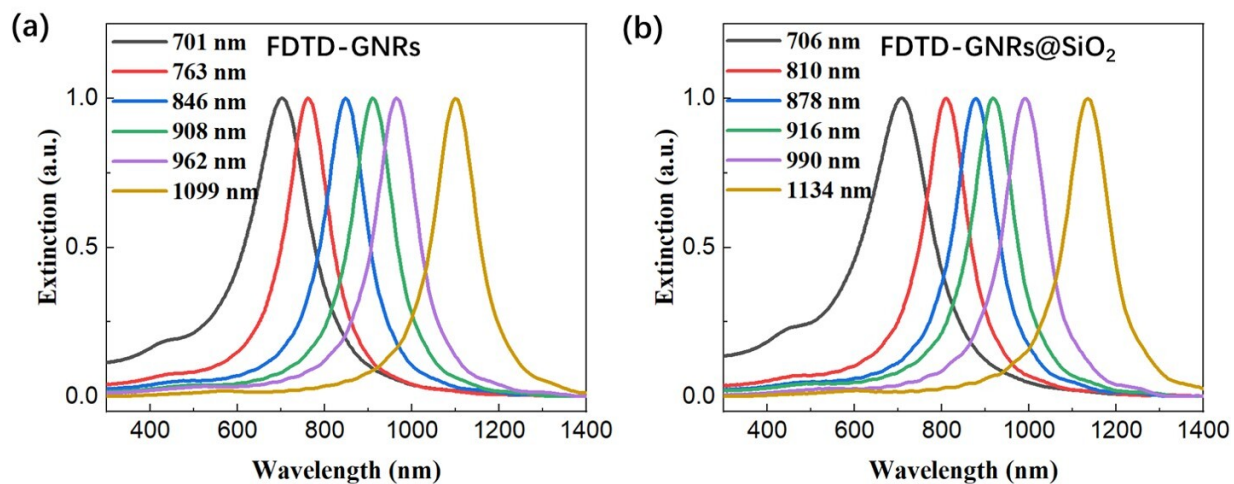

**Fig. S3** FDTD simulated spectra. (a) FDTD simulated extinction spectra obtained by excitation of six GNRs of different LSPRs along the longitudinal axis. (b) FDTD simulated extinction spectra obtained by excitation of six GNRs@SiO<sub>2</sub> of different LSPRs along the longitudinal axis.

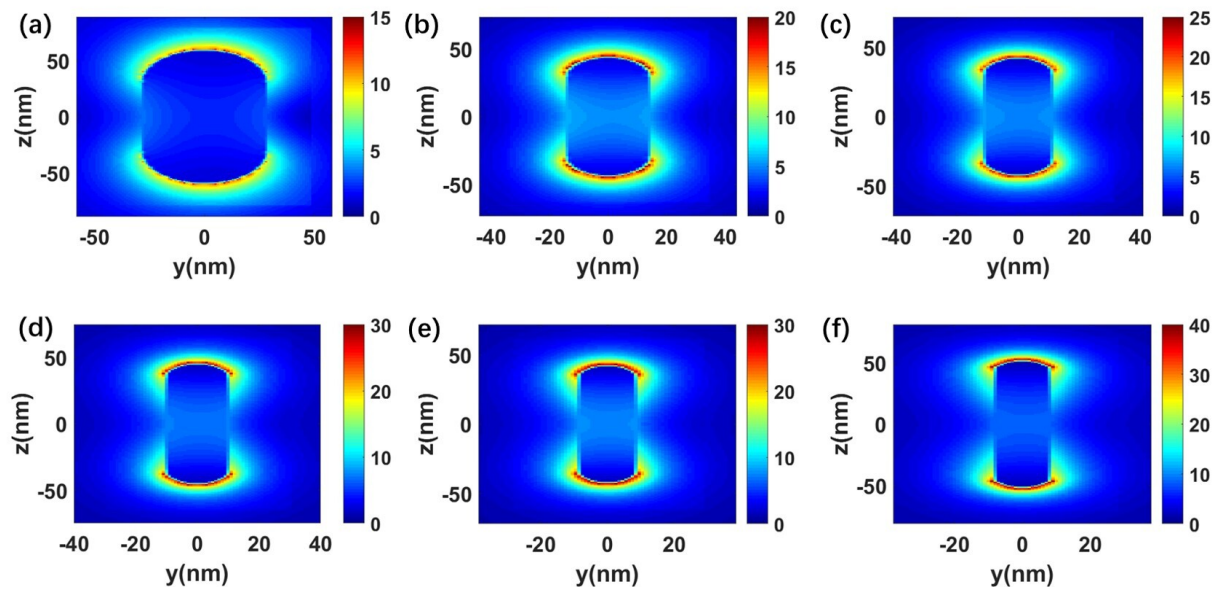

**Fig. S4** FDTD simulations of the electric field distribution of single GNRs with different LSPRs, corresponding to Fig. 2a (1-6) of GNRs.

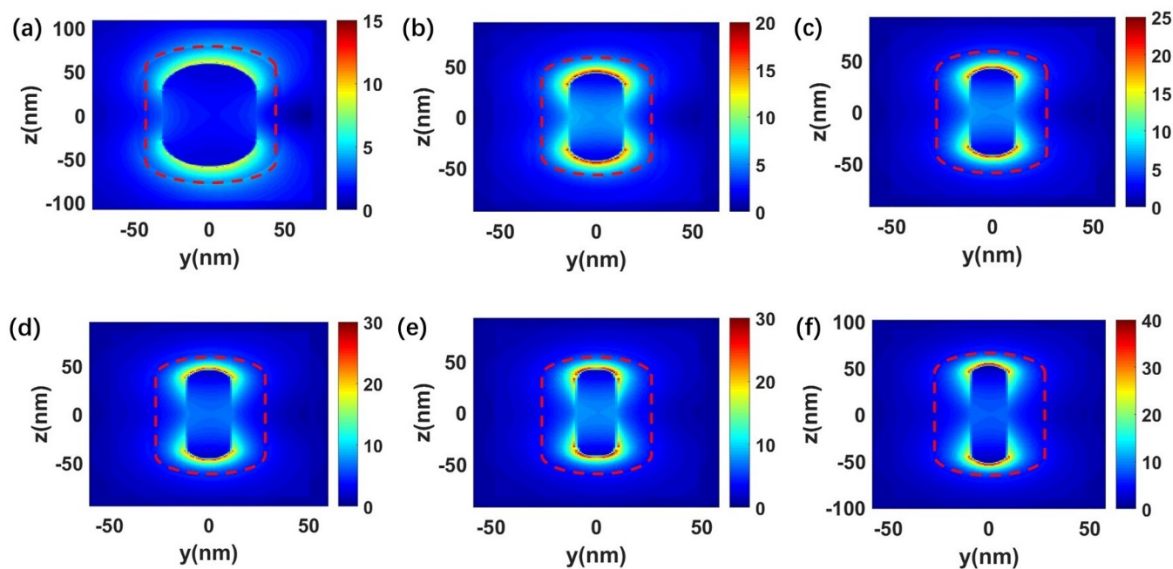

**Fig. S5** FDTD simulations of the electric field distribution of a single GNRs@SiO<sub>2</sub> with different LSPRs, corresponding to Fig. 2a (1-6) of GNRs@SiO<sub>2</sub>. There is a layer of mesoporous silica with a thickness of 20 nm on the surface of the GNRs, as shown in the figure between the red dotted line and the GNRs. The electric field outside the red dotted line is very weak.

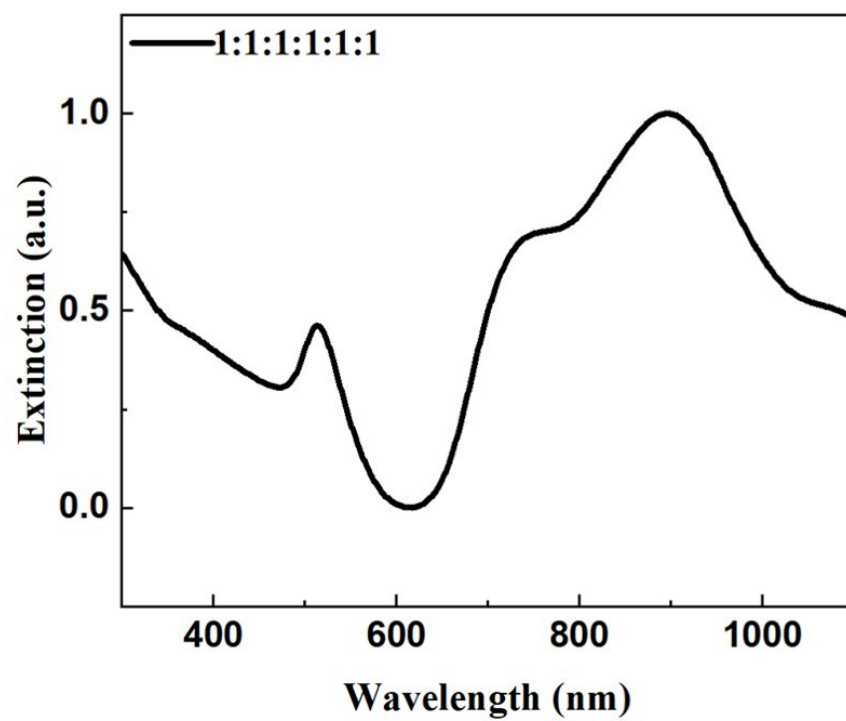

**Fig. S6** The calculated spectrum of the mixed solution by the ratio of 1:1:1:1:1.

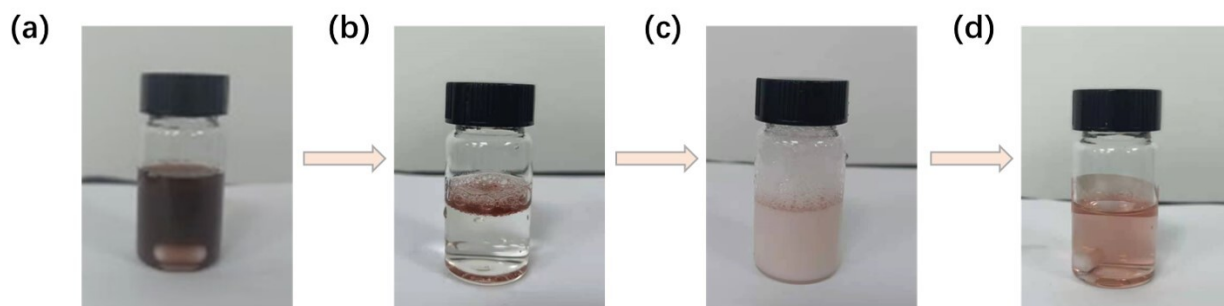

**Fig. S7** Photographs of the main steps in the process of self-assembling GNRs@SiO<sub>2</sub> particles into superparticles. (a) The mixed GNRs@SiO<sub>2</sub> dispersed in ethanol solution. (b) The oil-water layered interface is made with GNRs@SiO<sub>2</sub>@OTMS particles dispersed in cyclohexane in the upper layer and deionized water in the lower layer. (c) The emulsion obtained after sonication. (d) The broadband superparticles obtained after evaporation of cyclohexane.

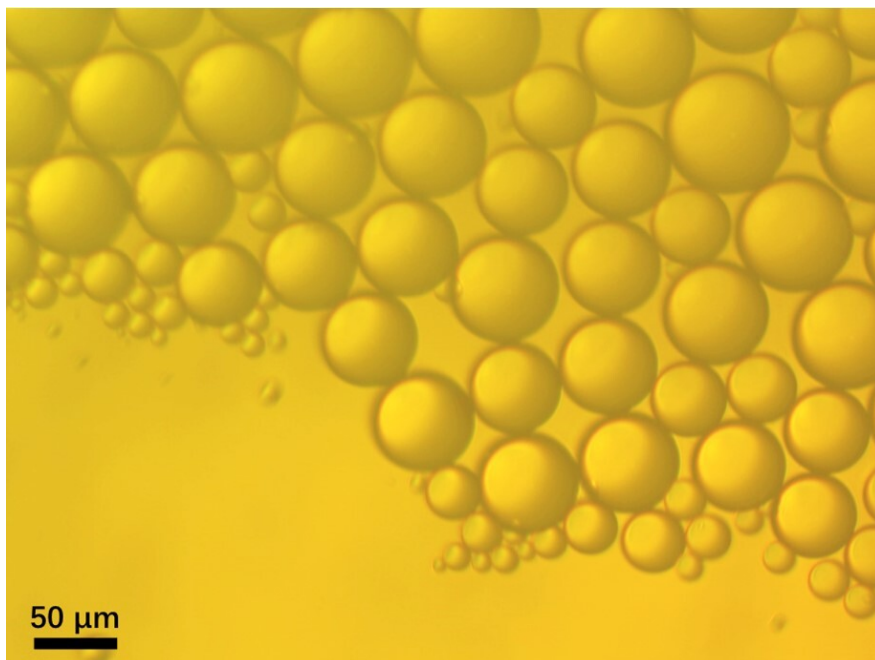

**Fig. S8** The cyclohexane oil droplets in the emulsion photographed under an optical microscope with a 10x objective.

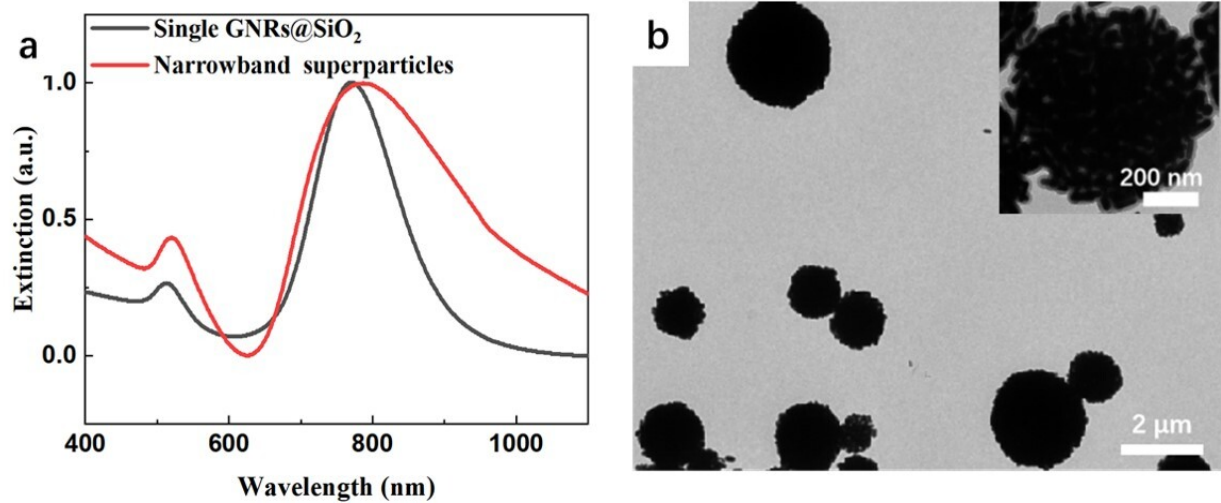

**Fig. S9** Extinction spectroscopy and TEM characterization. (a) Extinction spectroscopy of single GNRs@SiO<sub>2</sub> (black, LSPR at 760 nm) and their corresponding superparticles (red). (b) TEM images of narrowband superparticles with average size 1.1 μm.

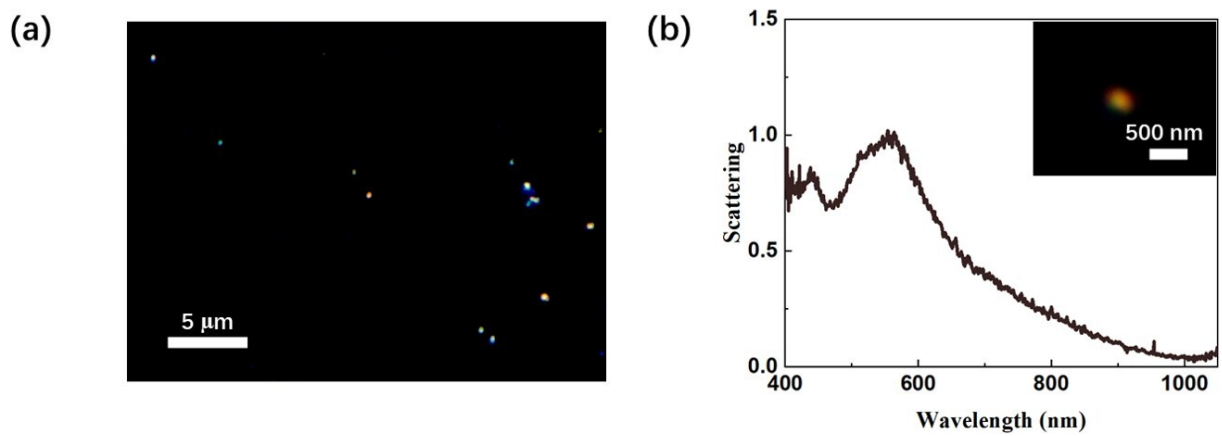

**Fig. S10** GNRs@SiO<sub>2</sub> picture in darkfield mode and its corresponding single-particle scattering spectrum. (a) Fig. 2a1 of the GNRs@SiO<sub>2</sub> were prepared on a silicon wafer after dilution of 1000 times, followed by photographs taken with an Olympus BX53M optical microscope with the objective (100×, NA= 0.80). (b) The darkfield single-particle scattering spectrum of the GNRs@SiO<sub>2</sub>, and the inset is the picture of corresponding particle taken under dark field condition.

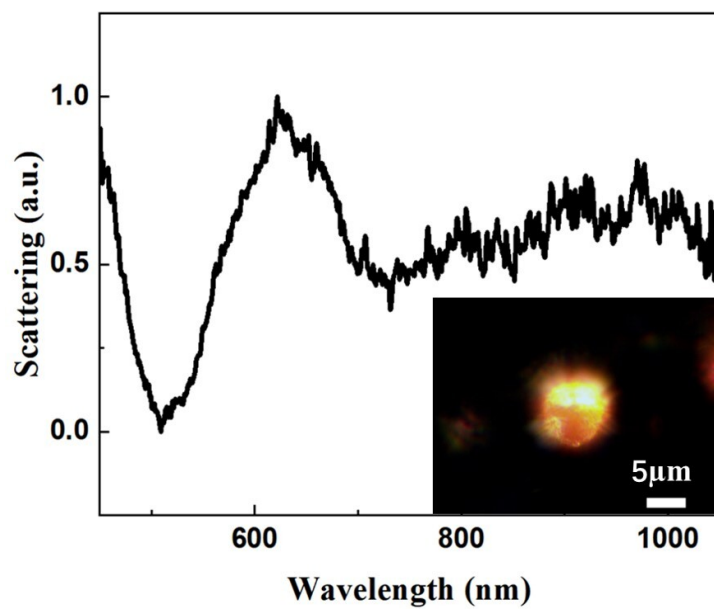

**Fig. S11** Darkfield single-particle scattering spectra of broadband superparticles and corresponding photographs. The photograph was taken with an Olympus BX53M optical microscope with the objective (100×, NA= 0.80).

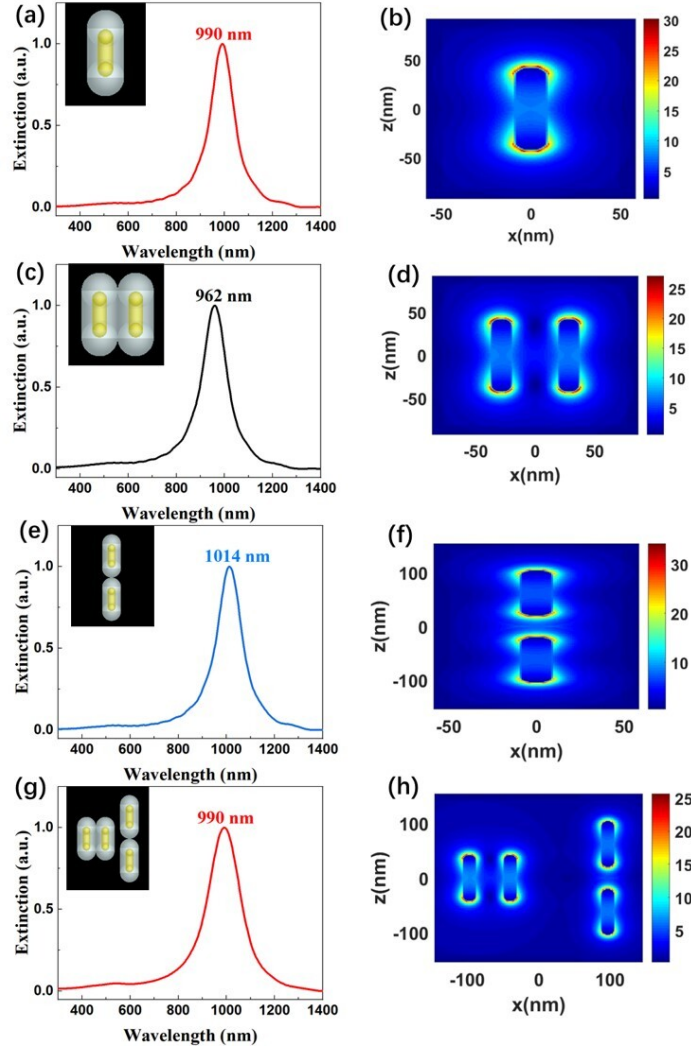

**Fig. S12** The extinction spectra and electric field distributions obtained by FDTD simulations illustrate that the plasmonic coupling effect between the GNRs@SiO<sub>2</sub> can be ignored. (a, b) extinction spectra (a) and electric field distribution (b) of the GNRs@SiO<sub>2</sub> with the LSPR of 990 nm in Fig. S2b. (c, d) (c) is two GNRs@SiO<sub>2</sub> of the same size as the model in (a) arranged side-by-side and (d) is the corresponding electric field distribution. (e, f) (e) is two GNRs@SiO<sub>2</sub> of the same size as the model in (a) arranged head-to-head and (f) is the corresponding electric field distribution. (g, h) (g) is the GNRs@SiO<sub>2</sub> arranged side-by-side and head-to-head together, the peak position is similar to (a), and (h) is the electric field distribution.

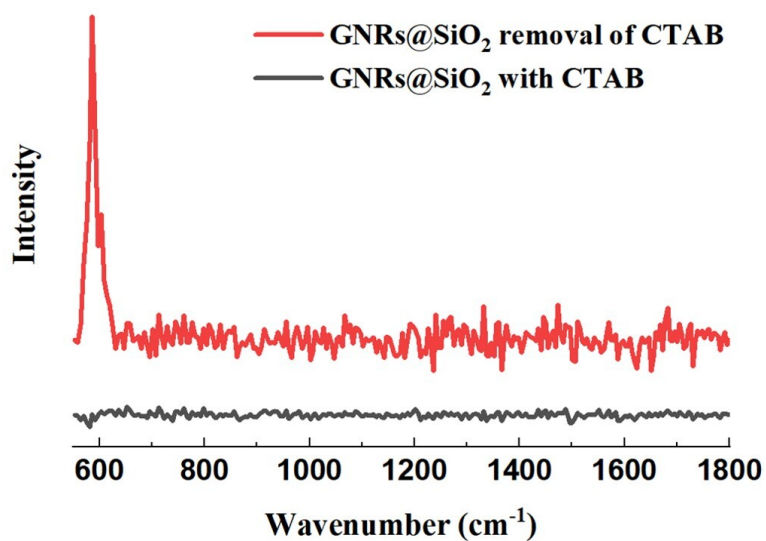

**Fig. S13** Effect of removal of CTAB template on SERS performance of GNRs@SiO<sub>2</sub>. The Raman measurements were recorded with a 785 nm laser, 200 mW laser power, 50 x air objective (NA= 0.75), 10 s exposure time and 1 accumulation per spot.

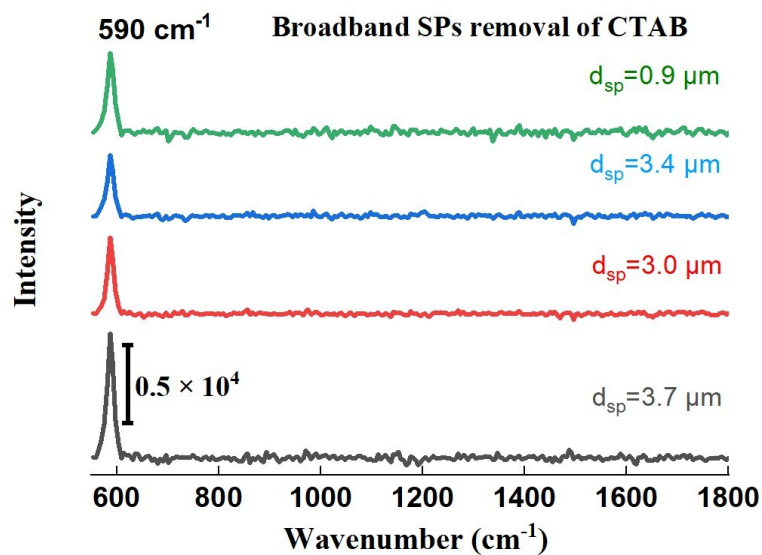

**Fig. S14** SERS performance of different sizes of the GNRs@SiO<sub>2</sub> superparticles. The Raman measurements were recorded with a 785 nm laser, 200 mW laser power, 50 x air objective (NA= 0.75), 10 s exposure time and 1 accumulation per spot.

**Table S1.** Preparation parameters of 6 different sizes of GNRs and related data of measured sizes. The concentrations of AgNO<sub>3</sub>, HAuCl<sub>4</sub>, HCl, and AA solutions were 4 mM, 0.01 M, 12.1 M, 0.064 M.

| CTAB<br>(g) | NaOL<br>(g) | AgNO <sub>3</sub><br>(mL) | HAuCl <sub>4</sub><br>(mL) | HCl<br>(mL) | AA<br>(mL) | Seed<br>(mL) | Average<br>length (nm) | Average<br>diameter<br>(nm) | Average<br>AR | Fig.<br>number |
|-------------|-------------|---------------------------|----------------------------|-------------|------------|--------------|------------------------|-----------------------------|---------------|----------------|
| 7.0         | 1.23        | 12.0                      | 25.0                       | 2.1         | 1.25       | 0.8          | 117.5±6.4              | 56.3±2.6                    | 2.1±0.2       | Fig.<br>2a1    |
| 7.0         | 1.23        | 24.0                      | 25.0                       | 1.5         | 1.25       | 0.4          | 86.8±8.3               | 28.2±2.0                    | 3.1±0.4       | Fig.<br>2a2    |
| 9.0         | 1.23        | 24.0                      | 25.0                       | 1.5         | 1.25       | 0.1          | 84.1±14.0              | 21.4±3.8                    | 3.9±0.4       | Fig.<br>2a3    |
| 9.0         | 1.23        | 24.0                      | 25.0                       | 2.1         | 1.25       | 0.1          | 90.1±5.4               | 20.5±1.5                    | 4.4±0.5       | Fig.<br>2a4    |
| 7.0         | 1.23        | 24.0                      | 25.0                       | 3.6         | 1.25       | 0.8          | 84.0±17.6              | 17.0±1.0                    | 4.9±1.1       | Fig.<br>2a5    |
| 7.0         | 1.23        | 24.0                      | 25.0                       | 5.4         | 1.25       | 0.8          | 103.0±13.3             | 15.7±1.8                    | 6.6±0.9       | Fig.<br>2a6    |
